# Supplementary material for: Ambipolar organic phototransistors based on 6,6′-dibromoindigo
Source: Royal Society of Chemistry journal article supplement (doi:10.1039/c8ra02346h), 2018-01-01
Supplement: c8ra02346h1.pdf [file c8ra02346h1.pdf]

**Supporting Information for:**

## **Ambipolar Organic Phototransistors Based on 6,6'-Dibromoindigo**

*Hyo Eun Kim,<sup>a</sup> Gyoungsik Kim,<sup>b</sup> Inho Song,<sup>a</sup> Jungho Lee,<sup>b</sup> Hanum Abdullah,<sup>a</sup> Changduk Yang,<sup>\*,b</sup> and Joon Hak Oh<sup>\*,a</sup>*

<sup>a</sup>Department of Chemical Engineering, Pohang University of Science and Technology (POSTECH), Pohang, Gyeongbuk 790-784, South Korea, E-mail: joonhoh@postech.ac.kr

<sup>b</sup>Department of Energy Engineering, School of Energy and Chemical Engineering, Perovtronics Research Center, Low Dimensional Carbon Materials Center, Ulsan National Institute of Science and Technology (UNIST), 50 UNIST-gil, Ulju-gun, Ulsan 44919, South Korea, E-mail: yang@unist.ac.kr

## Supporting Figures

|                                                                                                       |    |
|-------------------------------------------------------------------------------------------------------|----|
| Infrared spectrum for 6-BrIG (Supporting <b>Figure 1</b> )                                            | S3 |
| Thermogravimetric analysis of 6-BrIG (Supporting <b>Figure 2</b> )                                    | S3 |
| Transfer curves of 6-BrIG (Supporting <b>Figure 3</b> )                                               | S4 |
| AFM results of 6-BrIG films with different film thickness (Supporting <b>Figure 4</b> )               | S4 |
| EQE comparison of 6-BrIG phototransistors with different film thickness (Supporting <b>Figure 5</b> ) | S5 |
| Switch-on and -off photocurrent responses of 6-BrIG (Supporting <b>Figure 6</b> )                     | S5 |
| Voltage gain of the complementary inverter (Supporting <b>Figure 7</b> )                              | S6 |

## Supplementary Tables

|                                                                                                 |    |
|-------------------------------------------------------------------------------------------------|----|
| OFET performance of 6-BrIG film in the dark and under illumination (Supporting <b>Table 1</b> ) | S6 |
|-------------------------------------------------------------------------------------------------|----|

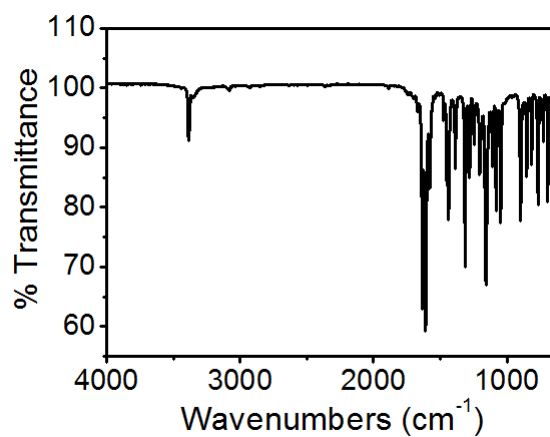

**Figure S1.** Infrared spectrum for 6-BrIG.

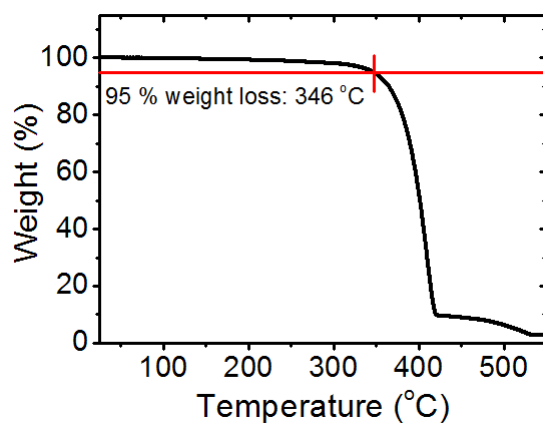

**Figure S2.** Thermogravimetric analysis of 6-BrIG.

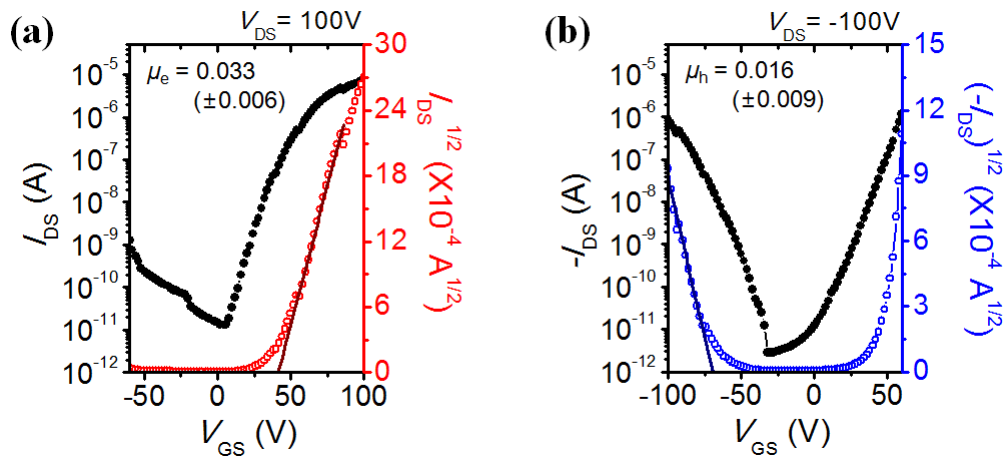

**Figure S3.** Current-voltage ( $I_{DS} - V_{GS}$ ) characteristics measured in a  $N_2$ -filled glovebox: (a) electron-enhancement operation,  $V_{DS} = 100$  V and (b) hole-enhancement operation,  $V_{DS} = -100$  V.

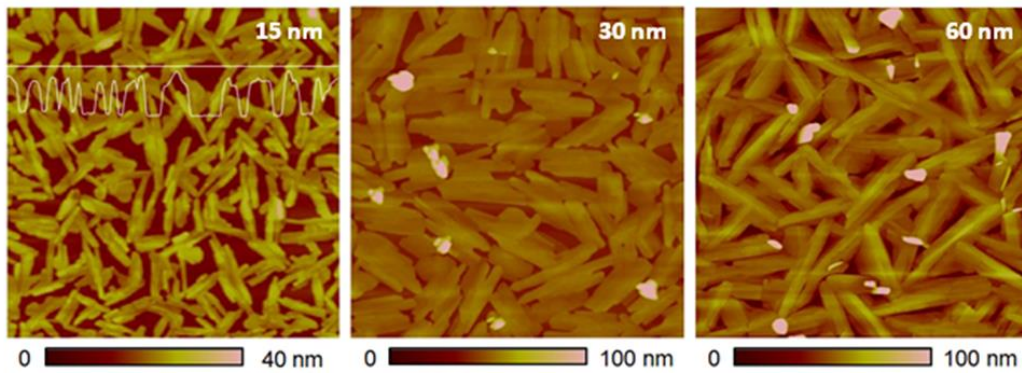

**Figure S4.** Tapping-mode AFM images ( $5 \mu m \times 5 \mu m$ ) of 6-BrIG films with different film thickness on OTS-treated  $SiO_2/Si$  substrates annealed at  $100^\circ C$ .

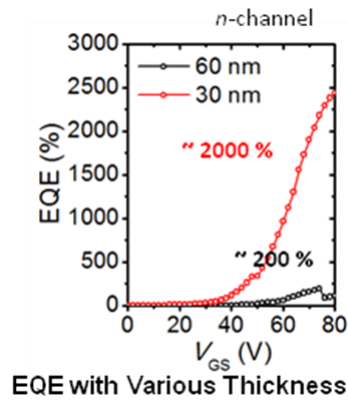

**Figure S5.** Comparison of the EQE values of 6-BrIG phototransistors with different film thicknesses.

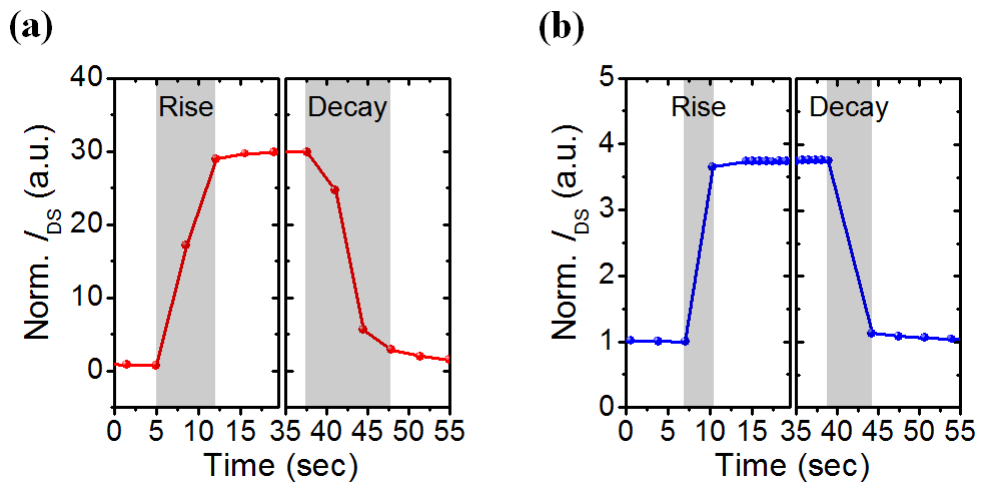

**Figure S6.** Switch-on and -off photocurrent responses as a function of time at  $|V_{GS}| = 20$  V: (a) *n*-dominant operation applying  $V_{DS} = 20$  V and (b) *p*-dominant operation applying  $V_{DS} = -80$  V.

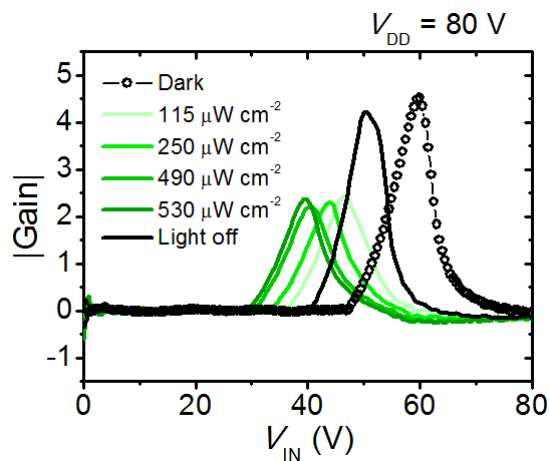

**Figure S7.** Voltage gain of the complementary inverter in dark and under green light with illumination intensities between 115-530  $\mu\text{W cm}^{-2}$ .

**Table S1.** OFET performance of 6-BrIG film in the dark and under illumination.

|                 | <i>n</i> -channel                                                       |                                  |                        | <i>p</i> -channel                                                     |                                  |                        |
|-----------------|-------------------------------------------------------------------------|----------------------------------|------------------------|-----------------------------------------------------------------------|----------------------------------|------------------------|
|                 | $\mu_{e,\text{max}}^a$<br>( $\text{cm}^2 \text{V}^{-1} \text{s}^{-1}$ ) | $I_{\text{on}} / I_{\text{off}}$ | $V_{\text{TH}}$<br>(V) | $\mu_{h,\text{max}}$<br>( $\text{cm}^2 \text{V}^{-1} \text{s}^{-1}$ ) | $I_{\text{on}} / I_{\text{off}}$ | $V_{\text{TH}}$<br>(V) |
| Dark            | 0.031<br>( $0.030 \pm 0.0004$ ) <sup>b</sup>                            | $> 10^7$                         | 43.6                   | $5.8 \times 10^{-4}$<br>( $4.9 \pm 0.8$ ) $\times 10^{-4}$            | $> 10^5$                         | -51.7                  |
| Mono<br>chromic | 0.034<br>( $0.032 \pm 0.0009$ )                                         | $> 10^6$                         | 35.8                   | $7.6 \times 10^{-4}$<br>( $6.4 \pm 0.5$ ) $\times 10^{-4}$            | $> 10^3$                         | -51.2                  |
| Poly<br>chromic | 0.032<br>( $0.031 \pm 0.0006$ )                                         | $> 10^5$                         | 33.8                   | $8.7 \times 10^{-4}$<br>( $7.8 \pm 0.6$ ) $\times 10^{-4}$            | $> 10^3$                         | -47.7                  |

<sup>a</sup> The maximum mobilities of the OFET devices ( $L = 50 \mu\text{m}$  and  $W/L = 17.5$ ). <sup>b</sup> The average mobilities and standard deviations are shown in parenthesis
